# Supplementary material for: Effect of Single Nucleotide Polymorphisms in the Vitamin D Metabolic Pathway on Susceptibility to Non-Small-Cell Lung Cancer
Source: MDPI journal article supplement (doi:10.3390/nu14214668), 2022-11-04
Supplement: s1 [file s1]

Table S5. Polymorphisms and association with risk of NSCLC.

| SNP        | Minor Allele | Mayor Allele | Model     | Cases     | Controls   | $\chi^2$ | p-value $\chi^2$ | p-value Fisher | Adjusted p-value* |
|------------|--------------|--------------|-----------|-----------|------------|----------|------------------|----------------|-------------------|
| rs1544410  | A            | G            | Genotypic | 25/108/71 | 97/181/126 | 11.77    | 0.00278          | 0.002042       | 0.0361            |
|            |              |              | Additive  | 158/250   | 375/433    | 6.286    | 0.01217          | 0.01217        | 0.1582            |
|            |              |              | Allelic   | 158/250   | 375/433    | 6.504    | 0.01076          | 0.01206        | 0.1399            |
|            |              |              | Dominant  | 133/71    | 278/126    | 0.8091   | 0.3684           | 0.4089         | 1                 |
|            |              |              | Recessive | 25/179    | 97/307     | 11.68    | 0.000632         | 0.0005676      | 0.0082            |
| rs11568820 | A            | G            | Genotypic | 11/73/120 | 23/158/215 | 1.128    | 0.5689           | 0.563          | 1                 |
|            |              |              | Additive  | 95/313    | 204/588    | 0.9067   | 0.341            | 0.341          | 1                 |
|            |              |              | Allelic   | 95/313    | 204/588    | 0.8805   | 0.3481           | 0.3605         | 1                 |
|            |              |              | Dominant  | 84/120    | 181/215    | 1.121    | 0.2898           | 0.299          | 1                 |
|            |              |              | Recessive | 11/193    | 23/373     | 0.04357  | 0.8347           | 1              | 1                 |
| rs2228570  | T            | C            | Genotypic | 24/90/89  | 55/185/165 | 0.6869   | 0.7093           | 0.7302         | 1                 |
|            |              |              | Additive  | 138/268   | 295/515    | 0.6869   | 0.4072           | 0.4072         | 1                 |
|            |              |              | Allelic   | 138/268   | 295/515    | 0.6963   | 0.404            | 0.41           | 1                 |
|            |              |              | Dominant  | 114/89    | 240/165    | 0.5348   | 0.4646           | 0.4861         | 1                 |
|            |              |              | Recessive | 24/179    | 55/350     | 0.3695   | 0.5433           | 0.6097         | 1                 |
| rs7975232  | C            | A            | Genotypic | 54/98/52  | 79/203/121 | 4.041    | 0.1326           | 0.1389         | 1                 |
|            |              |              | Additive  | 206/202   | 361/445    | 3.523    | 0.06051          | 0.06051        | 0.7866            |
|            |              |              | Allelic   | 206/202   | 361/445    | 3.537    | 0.06001          | 0.06768        | 0.7801            |
|            |              |              | Dominant  | 152/52    | 282/121    | 1.367    | 0.2424           | 0.2547         | 1                 |
|            |              |              | Recessive | 54/150    | 79/324     | 3.733    | 0.05333          | 0.06145        | 0.6933            |
| rs731236   | C            | T            | Genotypic | 21/110/72 | 73/188/140 | 6.819    | 0.03306          | 0.02979        | 0.4297            |
|            |              |              | Additive  | 152/254   | 334/468    | 2.037    | 0.1535           | 0.1535         | 1                 |
|            |              |              | Allelic   | 152/254   | 334/468    | 1.984    | 0.1589           | 0.1719         | 1                 |
|            |              |              | Dominant  | 131/72    | 261/140    | 0.01824  | 0.8926           | 0.9282         | 1                 |
|            |              |              | Recessive | 21/182    | 73/328     | 6.336    | 0.01183          | 0.01242        | 0.1537            |
| rs7041     | T            | G            | Genotypic | 43/92/68  | 77/212/115 | 2.824    | 0.2437           | 0.2445         | 1                 |
|            |              |              | Additive  | 178/228   | 366/442    | 0.2342   | 0.6285           | 0.6285         | 1                 |
|            |              |              | Allelic   | 178/228   | 366/442    | 0.2312   | 0.6306           | 0.6686         | 1                 |
|            |              |              | Dominant  | 135/68    | 289/115    | 1.625    | 0.2024           | 0.2231         | 1                 |
|            |              |              | Recessive | 43/92/68  | 77/212/115 | 2.824    | 0.2437           | 0.2445         | 1                 |
| rs10741657 | A            | G            | Genotypic | 43/160    | 77/327     | 0.3839   | 0.5355           | 0.5893         | 1                 |
|            |              |              | Additive  | 26/97/78  | 70/172/156 | 2.565    | 0.2773           | 0.281          | 1                 |
|            |              |              | Allelic   | 149/253   | 312/484    | 0.4874   | 0.4851           | 0.4851         | 1                 |
|            |              |              | Dominant  | 149/253   | 312/484    | 0.5125   | 0.474            | 0.4896         | 1                 |
|            |              |              | Recessive | 123/78    | 242/156    | 0.008534 | 0.9264           | 1              | 1                 |
| rs4646536  | G            | A            | Genotypic | 15/70/118 | 32/149/225 | 0.4039   | 0.8171           | 0.8216         | 1                 |
|            |              |              | Additive  | 100/306   | 213/599    | 0.3433   | 0.5579           | 0.5579         | 1                 |
|            |              |              | Allelic   | 100/306   | 213/599    | 0.3633   | 0.5467           | 0.5782         | 1                 |
|            |              |              | Dominant  | 85/118    | 181/225    | 0.4038   | 0.5251           | 0.5449         | 1                 |
|            |              |              | Recessive | 15/188    | 32/374     | 0.04611  | 0.83             | 0.8736         | 1                 |
| rs3782130  | C            | G            | Genotypic | 13/69/120 | 30/149/221 | 0.9764   | 0.6137           | 0.6267         | 1                 |
|            |              |              | Additive  | 95/309    | 209/591    | 0.9311   | 0.3346           | 0.3346         | 1                 |
|            |              |              | Allelic   | 95/309    | 209/591    | 0.969    | 0.3249           | 0.3611         | 1                 |
|            |              |              | Dominant  | 82/120    | 179/221    | 0.944    | 0.3313           | 0.3395         | 1                 |
|            |              |              | Recessive | 13/189    | 30/370     | 0.2292   | 0.6321           | 0.7383         | 1                 |
| rs10877012 | T            | G            | Genotypic | 13/70/120 | 32/151/218 | 1.363    | 0.5057           | 0.5184         | 1                 |
|            |              |              | Additive  | 96/310    | 215/587    | 1.352    | 0.2449           | 0.2449         | 1                 |
|            |              |              | Allelic   | 96/310    | 215/587    | 1.41     | 0.235            | 0.265          | 1                 |
|            |              |              | Dominant  | 83/120    | 183/218    | 1.233    | 0.2667           | 0.2979         | 1                 |
|            |              |              | Recessive | 13/190    | 32/369     | 0.4855   | 0.4859           | 0.5174         | 1                 |
| rs703842   | C            | T            | Genotypic | 16/71/116 | 26/144/228 | 0.4052   | 0.8166           | 0.8139         | 1                 |
|            |              |              | Additive  | 103/303   | 196/600    | 0.07685  | 0.7816           | 0.7816         | 1                 |
|            |              |              | Allelic   | 103/303   | 196/600    | 0.08014  | 0.7771           | 0.7782         | 1                 |
|            |              |              | Dominant  | 87/116    | 170/228    | 0.001132 | 0.9732           | 1              | 1                 |
|            |              |              | Recessive | 16/187    | 26/372     | 0.3764   | 0.5395           | 0.6121         | 1                 |
| rs4809957  | G            | A            | Genotypic | 9/68/126  | 17/145/233 | 0.6055   | 0.7388           | 0.7373         | 1                 |
|            |              |              | Additive  | 86/320    | 179/611    | 0.3501   | 0.554            | 0.554          | 1                 |

|                                                                                                                |   |   |           |          |          |          |         |         |        |
|----------------------------------------------------------------------------------------------------------------|---|---|-----------|----------|----------|----------|---------|---------|--------|
|                                                                                                                |   |   | Allelic   | 86/320   | 179/611  | 0.3387   | 0.5606  | 0.6069  | 1      |
|                                                                                                                |   |   | Dominant  | 77/126   | 162/233  | 0.5307   | 0.4663  | 0.4818  | 1      |
|                                                                                                                |   |   | Recessive | 9/194    | 17/378   | 0.005424 | 0.9413  | 1       | 1      |
| rs6068816                                                                                                      | T | C | Genotypic | 7/44/152 | 3/75/325 | NA       | NA      | 0.02918 | NA     |
|                                                                                                                |   |   | Additive  | 58/348   | 81/725   | 4.619    | 0.03161 | 0.03161 | 0.4109 |
|                                                                                                                |   |   | Allelic   | 58/348   | 81/725   | 4.772    | 0.02893 | 0.03532 | 0.3761 |
|                                                                                                                |   |   | Dominant  | 51/152   | 78/325   | NA       | NA      | 0.1148  | NA     |
|                                                                                                                |   |   | Recessive | 7/196    | 3/400    | NA       | NA      | 0.01937 | NA     |
| Chr: chromosome; NA: not applicable; * p-value for Bonferroni correction; Shade means the value is significant |   |   |           |          |          |          |         |         |        |
