# Supplementary material for: Effect of Single Nucleotide Polymorphisms in the Vitamin D Metabolic Pathway on Susceptibility to Non-Small-Cell Lung Cancer
Source: MDPI journal article supplement (doi:10.3390/nu14214668), 2022-11-04
Supplement: s1 [file s1]

Table S1. Hardy-Weinberg Equilibrium.

| Chr | SNP        | Sample | Minor Allele | Major Allele | Genotype counts | Observed heterozygosity | Expected heterozygosity | p-value |
|-----|------------|--------|--------------|--------------|-----------------|-------------------------|-------------------------|---------|
| 4   | rs7041     | ALL    | T            | G            | 120/304/183     | 0.5008                  | 0.4946                  | 0.8056  |
| 4   | rs7041     | AFF    | T            | G            | 43/92/68        | 0.4532                  | 0.4924                  | 0.2565  |
| 4   | rs7041     | UNAFF  | T            | G            | 77/212/115      | 0.5248                  | 0.4956                  | 0.2697  |
| 11  | rs10741657 | ALL    | A            | G            | 96/269/234      | 0.4491                  | 0.4735                  | 0.2267  |
| 11  | rs10741657 | AFF    | A            | G            | 26/97/78        | 0.4826                  | 0.4665                  | 0.7621  |
| 11  | rs10741657 | UNAFF  | A            | G            | 70/172/156      | 0.4322                  | 0.4767                  | 0.07342 |
| 12  | rs731236   | ALL    | C            | T            | 94/298/212      | 0.4934                  | 0.4809                  | 0.5543  |
| 12  | rs731236   | AFF    | C            | T            | 21/110/72       | 0.5419                  | 0.4684                  | 0.03542 |
| 12  | rs731236   | UNAFF  | C            | T            | 73/188/140      | 0.4688                  | 0.486                   | 0.4734  |
| 12  | rs7975232  | ALL    | C            | A            | 133/301/173     | 0.4959                  | 0.4978                  | 0.9351  |
| 12  | rs7975232  | AFF    | C            | A            | 54/98/52        | 0.4804                  | 0.5                     | 0.5772  |
| 12  | rs7975232  | UNAFF  | C            | A            | 79/203/121      | 0.5037                  | 0.4946                  | 0.7628  |
| 12  | rs1544410  | ALL    | A            | G            | 122/289/197     | 0.4753                  | 0.4924                  | 0.4102  |
| 12  | rs1544410  | AFF    | A            | G            | 25/108/71       | 0.5294                  | 0.4746                  | 0.1393  |
| 12  | rs1544410  | UNAFF  | A            | G            | 97/181/126      | 0.448                   | 0.4974                  | 0.04586 |
| 12  | rs2228570  | ALL    | T            | C            | 79/275/254      | 0.4523                  | 0.4586                  | 0.7242  |
| 12  | rs2228570  | AFF    | T            | C            | 24/90/89        | 0.4433                  | 0.4487                  | 0.8761  |
| 12  | rs2228570  | UNAFF  | T            | C            | 55/185/165      | 0.4568                  | 0.4631                  | 0.83    |
| 12  | rs11568820 | ALL    | A            | G            | 34/231/335      | 0.385                   | 0.3742                  | 0.5143  |
| 12  | rs11568820 | AFF    | A            | G            | 11/73/120       | 0.3578                  | 0.3573                  | 1       |
| 12  | rs11568820 | UNAFF  | A            | G            | 23/158/215      | 0.399                   | 0.3825                  | 0.4326  |
| 12  | rs4646536  | ALL    | G            | A            | 47/219/343      | 0.3596                  | 0.3819                  | 0.1671  |
| 12  | rs4646536  | AFF    | G            | A            | 15/70/118       | 0.3448                  | 0.3713                  | 0.3434  |
| 12  | rs4646536  | UNAFF  | G            | A            | 32/149/225      | 0.367                   | 0.387                   | 0.3052  |
| 12  | rs3782130  | ALL    | C            | G            | 43/218/341      | 0.3621                  | 0.3775                  | 0.3311  |
| 12  | rs3782130  | AFF    | C            | G            | 13/69/120       | 0.3416                  | 0.3597                  | 0.4399  |
| 12  | rs3782130  | UNAFF  | C            | G            | 30/149/221      | 0.3725                  | 0.386                   | 0.5168  |
| 12  | rs10877012 | ALL    | T            | G            | 45/221/338      | 0.3659                  | 0.3823                  | 0.2881  |
| 12  | rs10877012 | AFF    | T            | G            | 13/70/120       | 0.3448                  | 0.3611                  | 0.5592  |
| 12  | rs10877012 | UNAFF  | T            | G            | 32/151/218      | 0.3766                  | 0.3924                  | 0.4448  |
| 12  | rs703842   | ALL    | C            | T            | 42/215/344      | 0.3577                  | 0.3737                  | 0.3254  |
| 12  | rs703842   | AFF    | C            | T            | 16/71/116       | 0.3498                  | 0.3787                  | 0.2694  |
| 12  | rs703842   | UNAFF  | C            | T            | 26/144/228      | 0.3618                  | 0.3712                  | 0.591   |
| 20  | rs4809957  | ALL    | G            | A            | 26/213/359      | 0.3562                  | 0.345                   | 0.4779  |
| 20  | rs4809957  | AFF    | G            | A            | 9/68/126        | 0.335                   | 0.3339                  | 1       |
| 20  | rs4809957  | UNAFF  | G            | A            | 17/145/233      | 0.3671                  | 0.3505                  | 0.3915  |
| 20  | rs6068816  | ALL    | T            | C            | 10/119/477      | 0.1964                  | 0.2031                  | 0.4214  |
| 20  | rs6068816  | AFF    | T            | C            | 7/44/152        | 0.2167                  | 0.2449                  | 0.1433  |
| 20  | rs6068816  | UNAFF  | T            | C            | 3/75/325        | 0.1861                  | 0.1808                  | 0.7832  |

Chr: Chromosome; ALL: All population; AFF: Case group; UNAFF: Control group; Shade means the value is significant
