# Supplementary material for: Effect of Single Nucleotide Polymorphisms in the Vitamin D Metabolic Pathway on Susceptibility to Non-Small-Cell Lung Cancer
Source: MDPI journal article supplement (doi:10.3390/nu14214668), 2022-11-04
Supplement: s1 [file s1]

Table S2. Linkage disequilibrium

[illegible]
