# Supplementary material for: Effect of Single Nucleotide Polymorphisms in the Vitamin D Metabolic Pathway on Susceptibility to Non-Small-Cell Lung Cancer
Source: MDPI journal article supplement (doi:10.3390/nu14214668), 2022-11-04
Supplement: s1 [file s1]

Table S4. Haplotype frequency estimates.

|    | rs1544410 | rs7975232 | rs731236 | rs4646536 | rs703842 | rs3782130 | rs10877012 | Total  | Case group | Control group | Cumulative frequency |
|----|-----------|-----------|----------|-----------|----------|-----------|------------|--------|------------|---------------|----------------------|
| 1  | G         | C         | T        | A         | T        | G         | G          | 0.3294 | 0.4048     | 0.2895        | 0.3294               |
| 2  | A         | A         | C        | A         | T        | G         | G          | 0.2379 | 0.2167     | 0.2455        | 0.5672               |
| 3  | A         | A         | C        | G         | C        | C         | T          | 0.103  | 0.1386     | 0.0889        | 0.6702               |
| 4  | G         | A         | T        | A         | T        | G         | G          | 0.0799 | 0.1006     | 0.0724        | 0.7501               |
| 5  | G         | C         | T        | G         | C        | C         | T          | 0.0667 | 0.0757     | 0.0606        | 0.8168               |
| 6  | A         | C         | T        | A         | T        | G         | G          | 0.0231 | NA         | 0.0356        | 0.8399               |
| 7  | G         | A         | T        | G         | C        | C         | T          | 0.0208 | 0.013      | 0.0217        | 0.8607               |
| 8  | A         | A         | T        | A         | T        | G         | G          | 0.0145 | 0.0124     | 0.0155        | 0.8752               |
| 9  | G         | A         | C        | A         | T        | G         | G          | 0.013  | 0.0025     | 0.0188        | 0.8883               |
| 10 | G         | C         | T        | G         | T        | C         | T          | 0.0106 | NA         | 0.0168        | 0.8989               |
| 11 | A         | A         | C        | G         | T        | C         | T          | 0.0083 | 0.0025     | 0.0116        | 0.9072               |
| 12 | A         | A         | T        | G         | C        | C         | T          | 0.0079 | NA         | 0.0125        | 0.915                |
| 13 | G         | C         | T        | A         | C        | G         | G          | 0.0075 | 0.0093     | 0.0072        | 0.9225               |
| 14 | A         | A         | C        | A         | C        | G         | G          | 0.0071 | 0.0029     | 0.009         | 0.9297               |
| 15 | G         | C         | T        | A         | T        | C         | G          | 0.0051 | NA         | 0.0081        | 0.9348               |
| 16 | A         | C         | T        | G         | C        | C         | T          | 0.0047 | NA         | 0.007         | 0.9395               |
| 17 | A         | A         | C        | G         | C        | C         | G          | 0.0042 | NA         | 0.0058        | 0.9437               |
| 18 | A         | A         | C        | G         | T        | G         | T          | 0.0038 | NA         | 0.0057        | 0.9475               |
| 19 | G         | C         | T        | G         | C        | G         | G          | 0.0037 | 0.0041     | 0.0037        | 0.9511               |
| 20 | G         | C         | T        | A         | T        | G         | T          | 0.0034 | NA         | 0.0052        | 0.9546               |
| 21 | A         | A         | C        | A         | T        | G         | T          | 0.0033 | NA         | 0.0051        | 0.9579               |
| 22 | A         | A         | C        | A         | C        | C         | T          | 0.0033 | NA         | 0.005         | 0.9612               |
| 23 | G         | A         | T        | G         | T        | C         | T          | 0.0031 | 0.0025     | 0.0033        | 0.9644               |
| 24 | A         | C         | C        | A         | T        | G         | G          | 0.0029 | 0.0036     | 0.0026        | 0.9672               |
| 25 | G         | C         | T        | G         | C        | G         | T          | 0.0028 | NA         | 0.0049        | 0.97                 |
| 26 | A         | A         | C        | A         | T        | C         | G          | 0.0026 | NA         | 0.0037        | 0.9726               |
| 27 | G         | A         | C        | G         | C        | C         | T          | 0.0024 | NA         | 0.0041        | 0.975                |
| 28 | G         | A         | C        | G         | T        | C         | T          | 0.0022 | NA         | 0.0029        | 0.9772               |
| 29 | A         | C         | C        | G         | C        | C         | T          | 0.0021 | 0.0048     | 4e-04         | 0.9793               |
| 30 | G         | A         | T        | A         | T        | G         | T          | 0.0019 | NA         | 0.0029        | 0.9811               |
| 31 | G         | C         | T        | G         | C        | C         | G          | 0.0018 | NA         | 0.0032        | 0.983                |
| 32 | G         | A         | T        | A         | C        | G         | G          | 0.0017 | 2e-04      | 0.0023        | 0.9847               |
| 33 | A         | A         | C        | G         | T        | C         | G          | 0.0017 | NA         | 0.0025        | 0.9863               |
| 34 | A         | A         | T        | A         | T        | G         | T          | 0.0016 | NA         | 0.0025        | 0.9879               |
| 35 | G         | A         | T        | G         | C        | C         | G          | 0.0015 | NA         | 0.0022        | 0.9894               |
| 36 | A         | A         | C        | G         | C        | G         | G          | 0.0012 | 0.0032     | NA            | 0.9906               |
| 37 | G         | C         | C        | A         | T        | G         | G          | 0.0011 | NA         | 0.0016        | 0.9917               |
| 38 | G         | A         | C        | G         | C        | G         | T          | 9e-04  | NA         | 0.0014        | 0.9926               |
| 39 | A         | C         | C        | G         | C        | G         | G          | 9e-04  | 0.0025     | NA            | 0.9934               |
| 40 | A         | A         | C        | G         | T        | G         | G          | 9e-04  | NA         | 0.0013        | 0.9943               |
| 41 | A         | A         | T        | A         | T        | C         | G          | 8e-04  | NA         | 0.0012        | 0.9951               |
| 42 | A         | A         | T        | G         | C        | G         | G          | 8e-04  | NA         | 0.0012        | 0.9959               |
| 43 | G         | A         | T        | A         | C        | G         | T          | 8e-04  | NA         | 0.0011        | 0.9967               |
| 44 | G         | C         | C        | G         | C        | C         | T          | 7e-04  | NA         | 0.0011        | 0.9975               |
| 45 | G         | A         | C        | A         | T        | C         | G          | 7e-04  | NA         | 8e-04         | 0.9981               |
| 46 | A         | C         | T        | A         | C        | G         | G          | 7e-04  | NA         | 9e-04         | 0.9988               |
| 47 | A         | A         | C        | G         | C        | G         | T          | 5e-04  | NA         | NA            | 0.9993               |
| 48 | A         | A         | T        | G         | T        | C         | T          | 4e-04  | NA         | 0             | 0.9996               |
| 49 | A         | A         | T        | A         | C        | G         | G          | 3e-04  | NA         | 4e-04         | 0.9999               |
| 50 | A         | C         | T        | G         | T        | C         | T          | 1e-04  | NA         | NA            | 1                    |
| 51 | G         | C         | T        | G         | T        | C         | G          | 0      | NA         | 0             | 1                    |
| 52 | G         | C         | T        | A         | C        | C         | T          | 0      | NA         | 0             | 1                    |

\* Rare haplotypes; NA: not available
