# Supplementary material for: Effect of Single Nucleotide Polymorphisms in the Vitamin D Metabolic Pathway on Susceptibility to Non-Small-Cell Lung Cancer
Source: MDPI journal article supplement (doi:10.3390/nu14214668), 2022-11-04
Supplement: s1 [file s1]

Table S3. Minor allele frequencies of SNPs.

| Chr                                          | SNP        | Minor Allele | Major Allele | MAF    |
|----------------------------------------------|------------|--------------|--------------|--------|
| 4                                            | rs7041     | T            | G            | 0.4481 |
| 11                                           | rs10741657 | A            | G            | 0.3848 |
| 12                                           | rs731236   | C            | T            | 0.4023 |
| 12                                           | rs7975232  | C            | A            | 0.4671 |
| 12                                           | rs1544410  | A            | G            | 0.4383 |
| 12                                           | rs2228570  | T            | C            | 0.3561 |
| 12                                           | rs11568820 | A            | G            | 0.2492 |
| 12                                           | rs4646536  | G            | A            | 0.257  |
| 12                                           | rs3782130  | C            | G            | 0.2525 |
| 12                                           | rs10877012 | T            | G            | 0.2575 |
| 12                                           | rs703842   | C            | T            | 0.2488 |
| 20                                           | rs4809957  | G            | A            | 0.2216 |
| 20                                           | rs6068816  | T            | C            | 0.1147 |
| Chr: Chromosome; MAF: Minor allele frequency |            |              |              |        |
